# Supplementary material for: Semi-automatic spray pyrolysis deposition of thin, transparent, titania films as blocking layers for dye-sensitized and perovskite solar cells
Source: publisher site journal article supplement (doi:10.3762/bjnano.9.105), 2018-04-10
Supplement: Additional file 1 [file 2190-4286-9-105-S1.pdf]

# Supporting Information

for

## **Semi-automatic spray pyrolysis deposition of thin, transparent, titania films as blocking layers for dye-sensitized and perovskite solar cells**

Hana Krýsová<sup>1</sup>, Josef Krýsa<sup>2\*</sup>, and Ladislav Kavan<sup>1</sup>

Address: <sup>1</sup>J. Heyrovský Institute of Physical Chemistry of the CAS, v. v. i.,  
Dolejškova 2155/3, 182 23 Prague 8, Czech Republic, and <sup>2</sup>University of  
Chemistry and Technology Prague, Technická 5, 166 28 Prague 6, Czech  
Republic

Email: Josef Krýsa - [josef.krýsa@vscht.cz](mailto:josef.krýsa@vscht.cz)

\* Corresponding author

## **Additional Experimental Data**

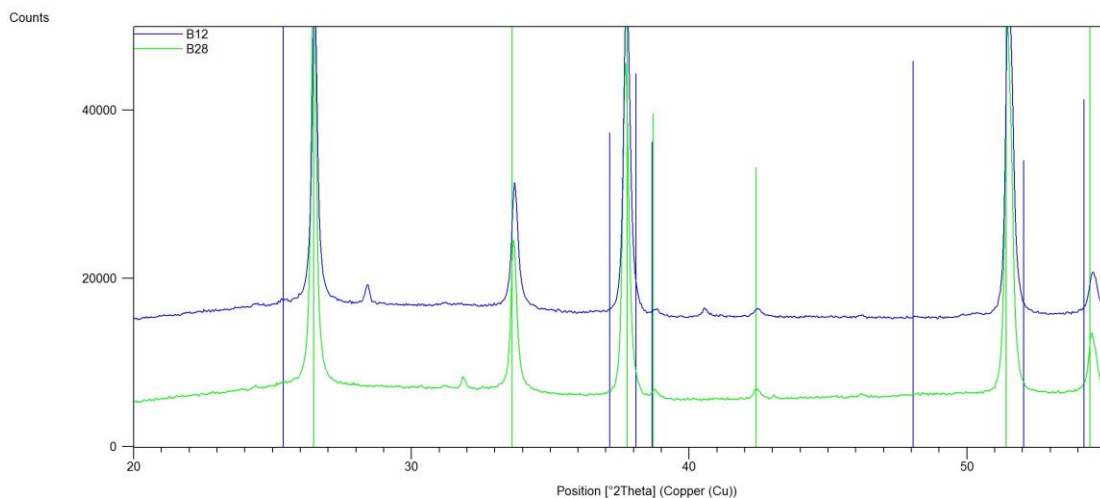

**Figure S1:** XRD patterns of an as-deposited (B28) and an annealed at 500 °C (B12) TiO<sub>2</sub> film on an FTO/glass substrate. Precursor 0.2 M TAA, deposition temperature 450 °C, 70 Spray Cycles. Vertical lines: PDF card no. 04-003-3369 (green) and no. 04-006-1918 (blue) [S1].

**Pattern List:**

| Ref. Code   | Compound Name  | Mineral Name     | Chemical Formula |
|-------------|----------------|------------------|------------------|
| 04-003-3369 | Tin Oxide      | Cassiterite, syn | SnO <sub>2</sub> |
| 04-006-1918 | Titanium Oxide | Anatase, syn     | TiO <sub>2</sub> |

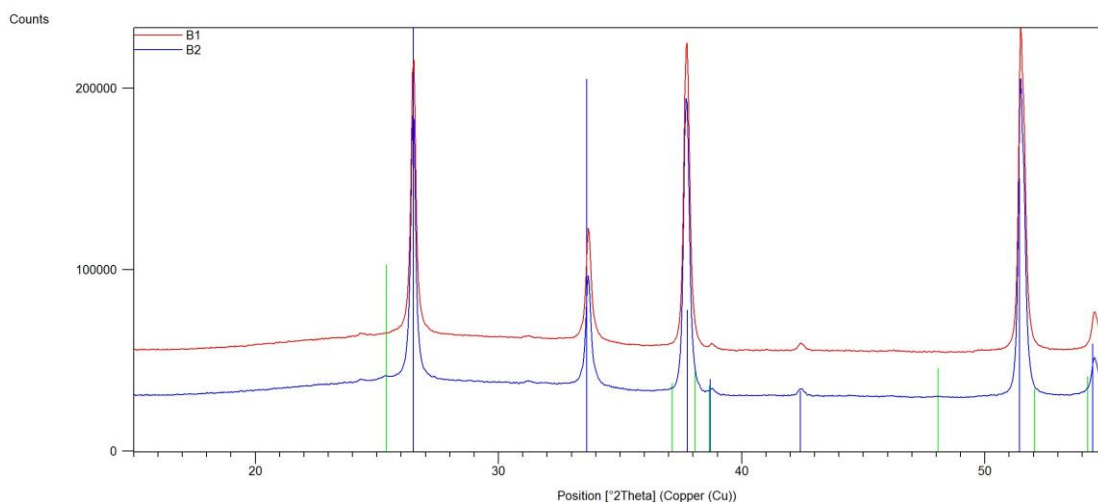

**Figure S2:** XRD patterns of an as-deposited (B1) and an annealed at 500 °C (B2) TiO<sub>2</sub> film on an FTO/glass substrate. Precursor 0.2 M TAA- AcAc, deposition temperature 450 °C, 70 Spray Cycles. Vertical lines: PDF card no. 04-003-3369 (blue) and no. 04-006-1918 (green) [S1].

From the XRD analysis, anatase crystalline structure was not detected for any as-deposited TiO<sub>2</sub> films even those consisting of 70 SC (0.2 M TAA and 0.2 M TAA- AcAc), see Fig. S1 (sample B28) and Fig. S2 (sample B1). For post-calcined TiO<sub>2</sub> films, anatase can be detected only for films consisting of 70 SC (only one band ( $\Theta = 25.4^\circ$ ), see Fig. S1. For TiO<sub>2</sub> films, consisting of 50 SC and less, anatase can not be detected even after post-calcination.

Similarly, XRD analysis of 70 SC TAA-AcAc film shows that band of anatase ( $\Theta = 25.4^\circ$ ) is visible only after post-calcination, see Fig. S2, sample B2.

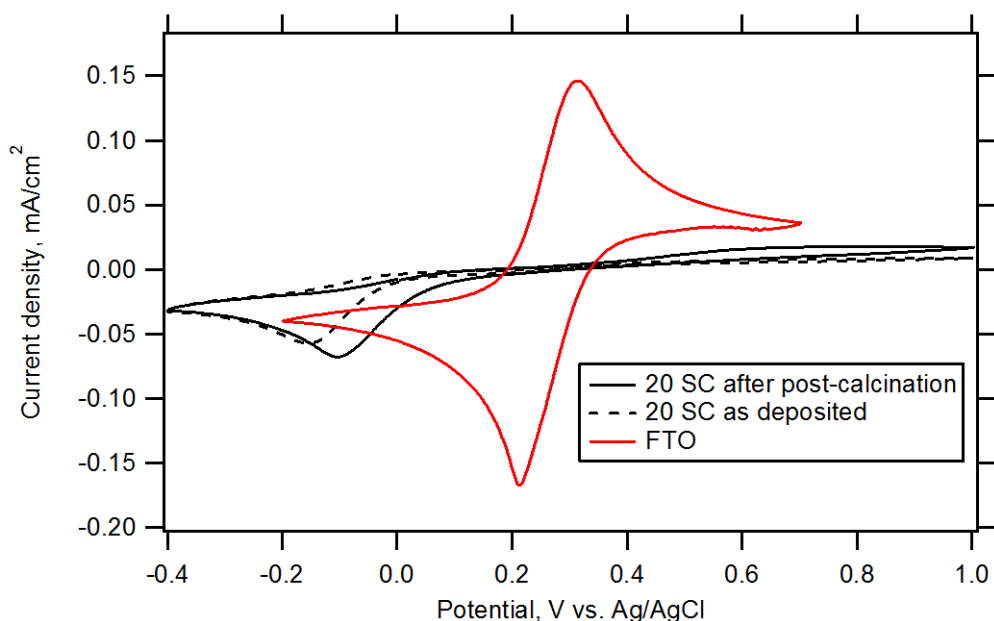

**Figure S3:** Cyclic voltammograms on a bare FTO(B) substrate and that covered by TiO<sub>2</sub> films consisting of 20 SC (0.2 M TAA). Scan rate 50 mV/s. Electrolyte solution was 0.5 mM Fe(CN)<sub>6</sub><sup>3-/4-</sup> in aqueous 0.5 M KCl, pH 2.5.

**Table S1:** Photocurrent densities at a potential of 1.2 V (vs. Ag/AgCl) for calcined TiO<sub>2</sub> film prepared from 0.05 M and 0.2 M TAA and from 0.2 M TAA – AcAc.

| Substrate | precursor    | No. of SC | j at 1.2 V (vs. Ag/AgCl) [ $\mu\text{A cm}^{-2}$ ] |
|-----------|--------------|-----------|----------------------------------------------------|
| FTO(A)    | 0.05 TAA     | 200       | 385                                                |
| FTO(B)    | 0.05 TAA     | 200       | 350                                                |
| FTO(B)    | 0.2 TAA      | 20        | 390                                                |
| FTO(B)    | 0.2 TAA      | 50        | 460                                                |
| FTO(B)    | 0.2 TAA      | 70        | 470                                                |
| FTO(B)    | 0.2 TAA-AcAc | 70        | 520                                                |

## References

[S1] ICDD (2017). “Powder Diffraction File,” edited by S.Kabekkodu, International Centre for Diffraction Data, 12 Campus Boulevard, Newton Square, Pennsylvania 19073-3272.
